# Supplementary material
Source: publisher figshare collection journal article supplement (https://karger.figshare.com/ndownloader/files/30950911)
Supplement: Supplementary file 1 [file 30950911]

| Table S1. Estimates of direct and indirect effects (mediated through passive smoking) of association between household income and asthma | | | | | | | | |
| --- | --- | --- | --- | --- | --- | --- | --- | --- |
|  |  |  |  |  |  |  |  |  |
|  | Estimated value | p value |  | Proportion mediated (%) | p value |  |  |  |
| Total effect | 0.015 | < 0.0001 |  |  |  |  |  |  |
| Natural indirect effects | 0.0011 | 0.02 |  | 7.8 | 0.03 |  |  |  |
| Natural direct effects | 0.013 | < 0.0001 |  |  |  |  |  |  |
| Household income was treated as dichotomous, with 0 = 4 million yen or more and 1 = less than 4 million yen. Models: Adjusted for maternal and paternal history of allergies, pre-pregnancy BMI, maternal age at pregnancy, mode of delivery, birth weight, gestational age at delivery, sex of the child, the presence of older siblings, exclusive breast-feeding, daycare attendance at 1 year old, and a history of respiratory syncytial viral infection | | | | | |  |  |  |
|  |  |  |
|  |  |  |
|  |  |  |
|  |  |  |

| Table S2. Household income and passive smoking | | | | |  |  |  |
| --- | --- | --- | --- | --- | --- | --- | --- |
|  |  |  |  |  |  |  |  |
| Household income (million JPY/year) | | Passive smoking at 1½ years | | | | | |
| None | | Sometimes | | Frequently | |
|  | < 2 | 2059 | (60.5) | 1029 | (30.2) | 315 | (9.3) |
|  | ≥ 2 to < 4 | 17393 | (71.6) | 5716 | (23.5) | 1194 | (4.9) |
|  | ≥ 4 to < 6 | 19321 | (79.3) | 4324 | (17.8) | 719 | (3.0) |
|  | ≥ 6 | 16973 | (84.4) | 2703 | (13.4) | 434 | (2.2) |
| Chi squared test: p < 0.01 | | |  |  |  |  |  |

| Table S3. Household income and eczema | | | |  |  |  |  |
| --- | --- | --- | --- | --- | --- | --- | --- |
|  |  |  |  |  |  |  |  |
| Household income (million JPY/year) | | Eczema at 3 years old | | | | | |
| Doctor-diagnosed | | Parent-reported | | With sleep disturbance | |
|  | < 2 | 284 | (8.4) | 414 | (12.2) | 180 | (5.3) |
|  | ≥ 2 to < 4 | 1808 | (7.4) | 2882 | (11.9) | 1228 | (5.1) |
|  | ≥ 4 to < 6 | 1715 | (7.0) | 3011 | (12.4) | 1183 | (4.9) |
|  | ≥ 6 | 1400 | (7.0) | 2605 | (13.0) | 1005 | (5.0) |
